# Supplementary material
Source: PubMed Central journal article supplement (PMC11627569)
Supplement: i2331-348X-29-6-614_s01.pdf [file i2331-348X-29-6-614_s01.pdf]

**Supplemental Figure. Patient selection based on exclusion criteria.**

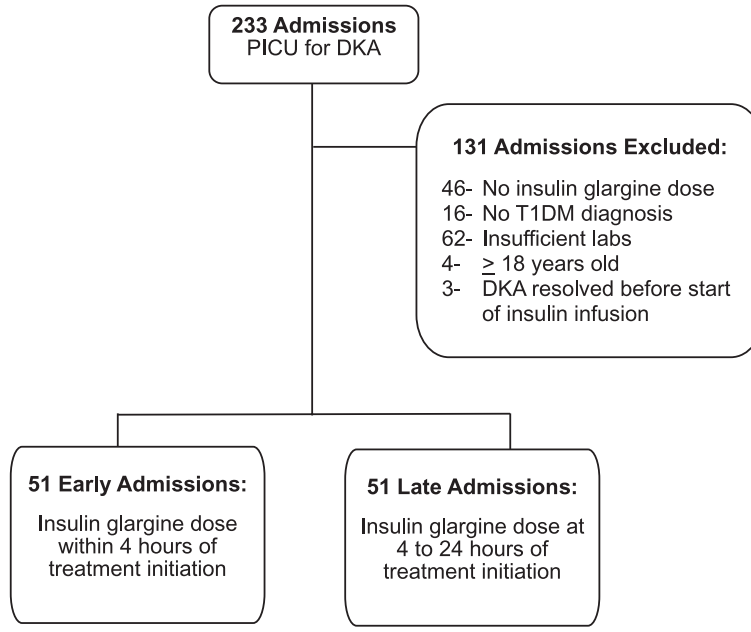

*DKA, diabetic ketoacidosis; PICU, pediatric intensive care unit; T1DM, type 1 diabetes mellitus.*

During the 7-year study period, there were a total of 233 admissions to the PICU for DKA. As a result of exclusion criteria, the final analysis included 51 admissions in the late administration group and 51 admissions in the early administration group

**Supplemental Table 1. Classification of Antiseizure Medications Affecting Cytochrome P-450 Isozymes That Metabolize Lacosamide**

| Isozyme | Inducer                                                                 |               |                                                                                                                      |                                                                                                             |             | Inhibitor                                   |                                          |                                                                                                                                                                                                      |                                                |  |
|---------|-------------------------------------------------------------------------|---------------|----------------------------------------------------------------------------------------------------------------------|-------------------------------------------------------------------------------------------------------------|-------------|---------------------------------------------|------------------------------------------|------------------------------------------------------------------------------------------------------------------------------------------------------------------------------------------------------|------------------------------------------------|--|
|         | Strong                                                                  | Moderate      | Weak                                                                                                                 | Neutral                                                                                                     | None        | Strong                                      | Moderate                                 | Weak                                                                                                                                                                                                 | Neutral                                        |  |
| CYP2C9  | Phenytoin                                                               | None          | Carbamazepine<br>Phenobarbital<br>Primidone                                                                          | Acetazolamide<br>Brivaracetam<br>Diazepam                                                                   | None        | None                                        | Eslicarbazepine<br>Stiripentol           | Valproic acid                                                                                                                                                                                        | Acetazolamide<br>Brivaracetam<br>Carbamazepine |  |
| CYP2C19 | Phenytoin                                                               | Carbamazepine | None                                                                                                                 | Ethosuximide<br>Ezogabine<br>Gabapentin<br>Lamotrigine<br>Levetiracetam<br>Lorazepam                        | Cannabidiol | Eslicarbazepine<br>Felbamate<br>Stiripentol | Oxcarbazepine<br>Topiramate<br>Valproate | Clonazepam<br>Clorazepate<br>Diazepam<br>Ethosuximide                                                                                                                                                |                                                |  |
| CYP3A4  | Carbamazepine<br>Phenobarbital<br>Phenytoin<br>Primidone<br>Stiripentol | None          | Clonazepam<br>Clonazepam<br>Clorazepate<br>Eslicarbazepine<br>Felbamate<br>Oxcarbazepine<br>Rufinamide<br>Topiramate | Methsuximide<br>Nitrazepam<br>Perampanel<br>Pregabalin<br>Valproate<br>Vigabatrin<br>Zolpidem<br>Zonisamide | Cannabidiol | Stiripentol                                 | Valproate                                | Ezogabine<br>Gabapentin<br>Lamotrigine<br>Levetiracetam<br>Lorazepam<br>Methsuximide<br>Nitrazepam<br>Perampanel<br>Phenobarbital<br>Phenytoin<br>Pregabalin<br>Rufinamide<br>Vigabatrin<br>Zolpidem |                                                |  |

Created using information at National Institutes of Health, US National Library of Medicine database. Accessed June 19, 2021. <https://dailymed.nlm.nih.gov/dailymed/>.

**Supplemental Table 2.** Characteristics of 646 Serum Samples in 380 Patients

| Variables                                | Results             |
|------------------------------------------|---------------------|
| Age, median (IQR), yr                    | 9.35 (5.19–13.94)   |
| Age brackets, n (%), yr                  |                     |
| 1 mo to <2                               | 73 (11.3)           |
| ≥2 to 6                                  | 125 (19.3)          |
| ≥6 to 12                                 | 219 (33.9)          |
| ≤12 to ≤ 18                              | 229 (35.5)          |
| Weight, median (IQR), kg                 | 31.4 (18.2–52.0)    |
| FDA dosing weights, n (%), kg            |                     |
| < 6                                      | 16 (2.5)            |
| ≥ 6–11                                   | 39 (6.0)            |
| ≥11–30                                   | 245 (37.9)          |
| ≥ 30–50                                  | 175 (27.1)          |
| ≥ 50                                     | 171 (26.5)          |
| Male, n (%)                              | 351 (54.3)          |
| Race, n (%)                              |                     |
| White                                    | 362 (56.0)          |
| Black                                    | 214 (33.1)          |
| Native American                          | 3 (0.5)             |
| Asian                                    | 7 (1.1)             |
| Unknown                                  | 60 (9.3)            |
| Lacosamide dose, median (IQR), mg/kg/day | 8.36 (5.92–11.16)   |
| Lacosamide SDC, median (IQR), mg/L*      | 7.1 (4.5–10.1)      |
| DCR, median (IQR), L/kg/hr               | 0.053 (0.036–0.083) |
| No. adjunctive ASM, median (IQR)         | 3 (2–3)             |

ASM, antiseizure medication; DCR, dose to serum concentration ratio; SDC, serum drug concentration

\*Reference range 2–12 mg/L.

**Supplemental Table 3. Summary of Sera Containing ASMs**

| ASM             | Total | Polytherapy With LCM |          |
|-----------------|-------|----------------------|----------|
|                 |       | With 1 ASM*          | > 1 ASM† |
| Acetazolamide   | 3     | 0                    | 3        |
| Brivaracetam    | 3     | 0                    | 3        |
| Cannabidiol     | 9     | 0                    | 9        |
| Carbamazepine   | 3     | 2                    | 1        |
| Clobazam        | 158   | 26                   | 132      |
| Clonazepam      | 40    | 6                    | 34       |
| Clorazepate     | 3     | 0                    | 3        |
| Corticotropin   | 1     | 0                    | 1        |
| Diazepam        | 17    | 2                    | 15       |
| Eslicarbazepine | 3     | 1                    | 2        |
| Ethosuximide    | 2     | 0                    | 2        |
| Ezogabine       | 0     | 0                    | 2        |
| Felbamate       | 24    | 1                    | 23       |
| Gabapentin      | 9     | 1                    | 8        |
| Lacosamide      | 646   | 98‡                  | 548      |
| Lamotrigine     | 44    | 11                   | 33       |
| Levetiracetam   | 238   | 67                   | 171      |
| Lorazepam       | 16    | 1                    | 15       |
| Methsuximide    | 1     | 0                    | 1        |
| Midazolam       | 4     | 1                    | 8        |
| Nitrazepam      | 3     | 0                    | 3        |
| Oxcarbazepine   | 50    | 17                   | 33       |
| Perampanel      | 35    | 3                    | 32       |
| Phenobarbital   | 67    | 1                    | 66       |
| Phenytoin       | 6     | 1                    | 5        |
| Piracetam       | 1     | 0                    | 1        |
| Pregabalin      | 8     | 2                    | 6        |
| Rufinamide      | 14    | 4                    | 10       |
| Topiramate      | 75    | 21                   | 54       |
| Valproate       | 86    | 26                   | 50       |
| Vigabatrin      | 36    | 3                    | 33       |
| Zonisamide      | 100   | 28                   | 72       |

ASM, antiseizure medication; LCM, lacosamide

\* Only ASM given in conjunction with LCM.

† Regimen contains LCM and specific ASM noted. May also contain other ASM.

‡ Lacosamide as monotherapy.
